# Supplementary material
Source: ML conference proceedings conference paper supplement (https://proceedings.mlr.press/v89/yu19c.html)
Supplement: Supplementary file [file yu19c-supp.pdf]

## A Technical proofs

### A.1 Proof of Lemma 1.

*Proof.* Since  $\hat{\Theta} = (\hat{\Theta}_1, \dots, \hat{\Theta}_K)$  are the global minimum of (5), we have

$$0 \geq f(\hat{\Theta}) - f(\Theta^*) \geq \langle \nabla f(\Theta^*), \hat{\Theta} - \Theta^* \rangle + \frac{\mu_\Theta}{2} \|\hat{\Theta} - \Theta^*\|_F^2.$$

We then have

$$\begin{aligned} \|\hat{\Theta} - \Theta^*\|_F^2 &\leq -\frac{2}{\mu_\Theta} \langle \nabla f(\Theta^*), \hat{\Theta} - \Theta^* \rangle \\ &\leq \frac{2}{\mu_\Theta} \|\nabla f(\Theta^*)\|_F \cdot \|\hat{\Theta} - \Theta^*\|_F. \end{aligned}$$

and hence

$$\|\hat{\Theta} - \Theta^*\|_F \leq \frac{2}{\mu_\Theta} \|\nabla f(\Theta^*)\|_F.$$

□

### A.2 Proof of Theorem 2.

*Proof.* We apply the non-convex optimization result in [37]. Since the initialization condition and (RSC/RSS) are satisfied for our problem according to Lemma 1, we apply Lemma 3 in [37] and obtain

$$\begin{aligned} d^2(B^{(t+1)}, B^*) &\leq \xi^2 \left[ \left(1 - \eta \cdot \frac{2}{5} \mu_{\min} \sigma_{\max}\right) \cdot d^2(B^{(t)}, B^*) \right. \\ &\quad \left. + \eta \cdot \frac{L_\Theta + \mu_\Theta}{L_\Theta \cdot \mu_\Theta} \cdot e_{\text{stat}, \Theta}^2 \right], \end{aligned} \quad (11)$$

where  $\xi^2 = 1 + \frac{2}{\sqrt{c-1}}$  and  $\sigma_{\max} = \max_k \|\Theta_k^*\|_2$ . Define the contraction value

$$\beta = \xi^2 \left(1 - \eta \cdot \frac{2}{5} \mu_{\min} \sigma_{\max}\right) < 1,$$

we can iteratively apply (11) for each  $t = 1, 2, \dots, T$  and obtain

$$d^2(B^{(T)}, B^*) \leq \beta^T d^2(B^{(0)}, B^*) + \frac{\xi^2 \eta}{1 - \beta} \cdot \frac{L_\Theta + \mu_\Theta}{L_\Theta \cdot \mu_\Theta} \cdot e_{\text{stat}, \Theta}^2,$$

which shows linear convergence up to statistical error. □

### A.3 Proof of Lemma 5.

*Proof.* Since  $\tilde{X}$  is the best rank  $K$  approximation for  $\bar{X}$ , and  $\bar{X}^*$  is also rank  $K$ , we have  $\|\tilde{X} - \bar{X}\|_F \leq \|\bar{X}^* - \bar{X}\|_F$  and hence

$$\begin{aligned} \|\tilde{X} - \bar{X}^*\|_F &\leq \|\tilde{X} - \bar{X}\|_F + \|\bar{X}^* - \bar{X}\|_F \\ &\leq 2\|\bar{X}^* - \bar{X}\|_F = 2\|\bar{E}\|_F. \end{aligned} \quad (12)$$

By definition we have

$$\begin{aligned} \bar{X}^* &= \sum_{k=1}^K \left( \frac{1}{n} \sum_{i=1}^n m_{ik}^* \right) \Theta_k^* = B_1^* A^* B_2^{*\top} \\ &= Q_1 R_1 A^* R_2^\top Q_2^\top = Q_1 (A_{\text{diag}} + A_{\text{off}}) Q_2^\top. \end{aligned}$$

Plugging back into (12) we obtain

$$\|\tilde{X} - Q_1 (A_{\text{diag}} + A_{\text{off}}) Q_2^\top\|_F \leq 2\|\bar{E}\|_F,$$

and hence

$$\begin{aligned} &\left\| \sum_{k=1}^K \tilde{\sigma}_k \tilde{u}_k \tilde{v}_k^\top - Q_1 A_{\text{diag}} Q_2^\top \right\|_F \\ &\leq 2\|\bar{E}\|_F + \|Q_1 A_{\text{off}} Q_2^\top\|_F \\ &\leq 2\|\bar{E}\|_F + \rho_0. \end{aligned} \quad (13)$$

Under mild conditions we have that  $\|\bar{E}\|_F \propto n^{-1/2}$  and therefore can be arbitrarily small with large enough  $n$ . Moreover, the left hand side of (13) is the difference of two singular value decompositions. According to the matrix perturbation theory, for each  $k$  we have (up to permutation)

$$\left\| \tilde{\sigma}_k \tilde{u}_k \tilde{v}_k^\top - q_{1,k} \cdot a_{\text{diag},k} \cdot q_{2,k}^\top \right\|_F \leq 2C\rho_0,$$

and hence

$$\left\| \tilde{\sigma}_k \tilde{u}_k \tilde{v}_k^\top - \frac{1}{n} \sum_{i=1}^n m_{ik}^* \Theta_k^* \right\|_F \leq 2\tilde{C}\rho_0.$$

Finally we obtain

$$\begin{aligned} \left\| K \cdot \tilde{\sigma}_k \tilde{u}_k \tilde{v}_k^\top - \Theta_k^* \right\|_F &= K \cdot \left\| \tilde{\sigma}_k \tilde{u}_k \tilde{v}_k^\top - \frac{1}{K} \Theta_k^* \right\|_F \\ &\leq K \cdot \left( 2\tilde{C}\rho_0 + \left| \frac{1}{n} \sum_{i=1}^n m_{ik}^* - \frac{1}{K} \right| \cdot \|\Theta_k^*\|_F \right) \\ &\leq 2\tilde{C}K\rho_0 + (\eta - 1)\sigma_{\max}. \end{aligned}$$

□

### A.4 Proof of Theorem 6

We analyze the two estimation step in Algorithm 2.

**Update on  $B_1$  and  $B_2$ .** The update algorithm on  $B_1$  and  $B_2$  is the same with known  $M$ . Besides the statistical error defined in (7), we now have an additional error term due to the error in  $M$ . Recall that  $d^2(M, M^*) = \frac{1}{n} \sum_{i=1}^n \sum_{k_0=1}^K (m_{ik_0} - m_{ik_0}^*)^2$ , Lemma 7 quantifies the effect of one estimation step on  $B$ .

**Lemma 7.** *Suppose the conditions in Theorem 2 hold and suppose condition (DC) and (OC) hold, we have*

$$d^2(B^{[t]}, B^*) \leq C_1 \cdot e_{\text{stat}, \Theta}^2 + \beta_1 \cdot d^2(M^{[t]}, M^*),$$

for some constant  $C_1$  and  $\beta_1$ .

**Update on  $M$ .** Lemma 8 quantifies the effect of one estimation step on  $M$ .

**Lemma 8.** *Suppose the condition (TC) holds, we have*

$$d^2(M^{[t]}, M^*) \leq C_2 \cdot e_{\text{stat}, M}^2 + \beta_2 \cdot d^2(B^{[t]}, B^*),$$

for some constant  $C_2$  and  $\beta_2$ .

Denote  $\beta_0 = \min\{\beta_1, \beta_2\}$ , as long as the signal  $\sigma_{\max}$  is small and the noise  $E_i$  is small enough we can guarantee that  $\beta_0 < 1$ . Combine Lemma 7 and 8 we complete the proof.

### A.5 Proof of Lemma 7.

*Proof.* The analysis is exactly the same with the case where  $M$  is known except that the statistical error is different. Specifically, for each  $k$  we have

$$\begin{aligned} & \nabla_{\Theta_k} f(\Theta^*, M) \\ &= -\frac{1}{n} \sum_{i=1}^n \left( X_i - \sum_{k_0=1}^K m_{ik_0} \Theta_{k_0}^* \right) \cdot m_{ik} \\ &= -\frac{1}{n} \sum_{i=1}^n \left( E_i + \sum_{k_0=1}^K (m_{ik_0}^* - m_{ik_0}) \Theta_{k_0}^* \right) \cdot m_{ik} \\ &= \underbrace{-\frac{1}{n} \sum_{i=1}^n E_i m_{ik}^*}_{R_1} + \underbrace{\frac{1}{n} \sum_{i=1}^n E_i (m_{ik}^* - m_{ik})}_{R_2} \\ & \quad + \underbrace{\frac{1}{n} \sum_{i=1}^n \sum_{k_0=1}^K (m_{ik_0} - m_{ik_0}^*) \Theta_{k_0}^* \cdot m_{ik}}_{R_3} \end{aligned}$$

The first term  $R_1$  is just the usual statistical error term on  $\Theta$ . For term  $R_2$ , denote  $e_0 = \frac{1}{n} \sum_{i=1}^n \|E_i\|_F^2$ , we have

$$\begin{aligned} \|R_2\|_F^2 &\leq \frac{1}{n^2} \left( \sum_{i=1}^n \|E_i\|_F^2 \right) \cdot \sum_{i=1}^n (m_{ik} - m_{ik}^*)^2 \\ &\leq \frac{e_0}{n} \sum_{i=1}^n (m_{ik} - m_{ik}^*)^2. \end{aligned}$$

For term  $R_3$ , we have

$$\begin{aligned} & \|R_3\|_F^2 \\ &\leq \frac{1}{n^2} \left\| \sum_{i=1}^n \sum_{k_0=1}^K (m_{ik_0} - m_{ik_0}^*) \Theta_{k_0}^* \cdot m_{ik} \right\|_F^2 \\ &\leq \frac{1}{n^2} \left( \sum_{i=1}^n \sum_{k_0=1}^K (m_{ik_0} - m_{ik_0}^*)^2 \right) \left( \sum_{i=1}^n \sum_{k_0=1}^K \|\Theta_{k_0}^*\|_F^2 \cdot m_{ik}^2 \right) \\ &\leq \frac{K \sigma_{\max}^2}{n^2} \left( \sum_{i=1}^n m_{ik}^2 \right) \cdot \left( \sum_{i=1}^n \sum_{k_0=1}^K (m_{ik_0} - m_{ik_0}^*)^2 \right). \end{aligned}$$

Taking summation over all  $k$ , the first term  $R_1$  gives the statistical error as before, the terms  $R_2$  and  $R_3$  gives

$$\sum_{k=1}^K \|R_2\|_F^2 + \|R_3\|_F^2 \leq \frac{e_0 + K \sigma_{\max}^2}{n} \left( \sum_{i=1}^n \sum_{k=1}^K (m_{ik} - m_{ik}^*)^2 \right). \quad \square$$

### A.6 Proof of Lemma 8.

*Proof.* The estimation on  $M$  is separable with each  $m_i$ . Denote the objective function on observation  $i$  as

$$f_i(\Theta, m_i) = \left\| X_i - \sum_{k=1}^K m_{ik} \cdot \Theta_k \right\|_F^2. \quad (14)$$

According to condition (DC), the objective function (14) is  $\mu_M$ -strongly convex in  $m_i$ . Similar to the proof of Lemma 1, we obtain

$$\begin{aligned} \sum_{k=1}^K (m_{ik} - m_{ik}^*)^2 &\leq \frac{4}{\mu_M^2} \left\| \nabla_{m_i} f_i(\Theta, m_i^*) \right\|_F^2 \\ &= \frac{4}{\mu_M^2} \sum_{k=1}^K \left[ \nabla_{m_{ik}} f_i(\Theta, m_i^*) \right]^2. \end{aligned}$$

Moreover, we have

$$\begin{aligned} \nabla_{m_{ik}} f_i(\Theta, m_i^*) &= - \left\langle X_i - \sum_{k_0=1}^K m_{ik_0}^* \cdot \Theta_{k_0}, \Theta_k \right\rangle \\ &= - \underbrace{\left\langle E_i, \Theta_k^* \right\rangle}_{T_1} + \underbrace{\left\langle E_i, (\Theta_k^* - \Theta_k) \right\rangle}_{T_2} \\ & \quad + \underbrace{\left\langle \sum_{k_0=1}^K m_{ik_0}^* (\Theta_{k_0} - \Theta_{k_0}^*), \Theta_k \right\rangle}_{T_3}. \end{aligned}$$

The first term  $T_1$  is just the usual statistical error term on  $M$ . For term  $T_2$ , we have

$$\begin{aligned} \sum_{i=1}^n \sum_{k=1}^K (T_2)^2 &\leq \sum_{i=1}^n \sum_{k=1}^K \|E_i\|_F^2 \cdot \|\Theta_k^* - \Theta_k\|_F^2 \\ &= \left( \sum_{i=1}^n \|E_i\|_F^2 \right) \cdot \left( \sum_{k=1}^K \|\Theta_k^* - \Theta_k\|_F^2 \right). \end{aligned} \quad (15)$$

For term  $T_3$  we have

$$\begin{aligned}
 \sum_{k=1}^K (T_3)^2 &\leq \left( \sum_{k=1}^K \|\Theta_k\|_F^2 \right) \left\| \sum_{k_0=1}^K m_{ik_0}^* (\Theta_{k_0} - \Theta_{k_0}^*) \right\|_F^2 \\
 &\leq K \sigma_{\max}^2 \left( \sum_{k=1}^K \|\Theta_k^* - \Theta_k\|_F^2 \right) \left( \sum_{k=1}^K m_{ik}^{*2} \right) \\
 &\leq K \sigma_{\max}^2 \left( \sum_{k=1}^K \|\Theta_k^* - \Theta_k\|_F^2 \right). \tag{16}
 \end{aligned}$$

Moreover, we have

$$\begin{aligned}
 \|\Theta_k^* - \Theta_k\|_F &= \|b_k^{1*} b_k^{2* \top} - b_k^1 b_k^{2 \top}\|_F \\
 &\leq \|b_k^{1*}\|_2 \|b_k^{2*} - b_k^2\|_2 + \|b_k^2\|_2 \|b_k^{1*} - b_k^1\|_2 \\
 &\leq 2 \sigma_{\max} (\|b_k^{2*} - b_k^2\|_2 + \|b_k^{1*} - b_k^1\|_2),
 \end{aligned}$$

and hence

$$\begin{aligned}
 &\sum_{k=1}^K \|\Theta_k^* - \Theta_k\|_F^2 \\
 &\leq 4 \sigma_{\max}^2 \sum_{k=1}^K (\|b_k^{2*} - b_k^2\|_2 + \|b_k^{1*} - b_k^1\|_2)^2 \\
 &\leq 8 \sigma_{\max}^2 d^2(B, B^*).
 \end{aligned}$$

Combine (15) and (16), taking summation over  $i$ , we obtain

$$\begin{aligned}
 &\frac{1}{n} \sum_{i=1}^n \sum_{k=1}^K (T_2)^2 + (T_3)^2 \\
 &\leq (e_0 + K \sigma_{\max}^2) \cdot \left( \sum_{k=1}^K \|\Theta_k^* - \Theta_k\|_F^2 \right) \\
 &\leq 8 \sigma_{\max}^2 (e_0 + K \sigma_{\max}^2) \cdot d^2(B, B^*). \quad \square
 \end{aligned}$$

## B Detailed rationale on initialization and condition (OC) for jointly learning

**Initialization.** Define  $\bar{X}$ ,  $\bar{X}^*$ ,  $\bar{E}$  as the sample mean of  $X_i$ ,  $X_i^*$ ,  $E_i$ , respectively. We have

$$\begin{aligned}
 \bar{X} &= \frac{1}{n} \sum_{i=1}^n X_i^* + E_i = \frac{1}{n} \sum_{i=1}^n \sum_{k=1}^K m_{ik}^* \Theta_k^* + \frac{1}{n} \sum_{i=1}^n E_i \\
 &= \sum_{k=1}^K \left( \frac{1}{n} \sum_{i=1}^n m_{ik}^* \right) \Theta_k^* + \bar{E} = \bar{X}^* + \bar{E}.
 \end{aligned}$$

We then do the rank- $K$  SVD on  $\bar{X}$  and obtain  $[\tilde{U}, \tilde{S}, \tilde{V}] = \text{rank-}K \text{ SVD of } \bar{X}$ . We denote  $\tilde{X} =$

$\tilde{U} \tilde{S} \tilde{V}^\top = \sum_{k=1}^K \tilde{\sigma}_k \tilde{u}_k \tilde{v}_k^\top$ . It is well known that  $\tilde{X}$  is the best rank  $K$  approximation for  $\bar{X}$ . We propose the following initialization method

$$\Theta_k^{(0)} = K \cdot \tilde{\sigma}_k \tilde{u}_k \tilde{v}_k^\top.$$

To see why this initialization works, we first build intuition for the easiest case, where  $E_i = 0$  for each  $i$ ,  $\frac{1}{n} \sum_{i=1}^n m_{ik}^* = \frac{1}{K}$  for each  $k$ , and the columns of  $B_1^*$  and  $B_2^*$  are orthogonal. In this case it is easy to see that  $\bar{X} = \bar{X}^* = \sum_{k=1}^K \frac{1}{K} \Theta_k^*$ . Note that this expression in a singular value decomposition of  $\bar{X}^*$  since we have  $\Theta_k^* = b_k^{1*} b_k^{2* \top}$  and the columns  $\{b_k^{1*}\}_{k=1}^K$  and columns  $\{b_k^{2*}\}_{k=1}^K$  are orthogonal. Now that  $\bar{X}$  is exactly rank  $K$ , the best rank  $K$  approximation would be itself, i.e.,  $\bar{X} = \tilde{X} = \sum_{k=1}^K \tilde{\sigma}_k \tilde{u}_k \tilde{v}_k^\top$ . By the uniqueness of singular value decomposition, as long as the singular values are distinct, we have (up to permutation)  $\frac{1}{K} \Theta_k^* = \tilde{\sigma}_k \tilde{u}_k \tilde{v}_k^\top$  and therefore  $\Theta_k^* = K \cdot \tilde{\sigma}_k \tilde{u}_k \tilde{v}_k^\top$ . This is exactly what we want to estimate.

With this intuition in mind, we relax the restrictions we have and impose the following condition.

**Orthogonal Condition (OC).** Let  $B_1^* = Q_1 R_1$  and  $B_2^* = Q_2 R_2$  be the QR decomposition of  $B_1^*$  and  $B_2^*$ , respectively. Denote  $A^*$  as a diagonal matrix with diagonal elements  $\frac{1}{n} \sum_{i=1}^n m_{ik}^*$ . Denote  $R_1 A^* R_2^\top = A_{\text{diag}} + A_{\text{off}}$  where  $A_{\text{diag}}$  captures the diagonal elements and  $A_{\text{off}}$  captures the off-diagonal elements. We require that  $\|A_{\text{off}}\|_F \leq \rho_0$  for some constant  $\rho_0$ . Moreover, we require that  $\frac{1}{n} \sum_{i=1}^n m_{ik}^* \leq \eta/K$  for some  $\eta$ .

This condition requires that  $B_1^*$  and  $B_2^*$  are not too far away from orthogonal matrix, so that when doing the QR rotation, the off diagonal values of  $R_1$  and  $R_2$  are not too large. The condition  $\frac{1}{n} \sum_{i=1}^n m_{ik}^* \leq \eta/K$  is trivially satisfied with  $\eta = K$ . However, in general  $\eta$  is usually a constant that does not scale with  $K$ , meaning that the topic distribution among the  $n$  observations is more like evenly distributed than several topics dominate.

Finally note that the condition (OC) is for this specific initialization method only. Since we are doing singular value decomposition, we end up with orthogonal vectors so we require that  $B_1^*$  and  $B_2^*$  are not too far away from orthogonal; since we do not know the value  $\frac{1}{n} \sum_{i=1}^n m_{ik}^*$  and use  $1/K$  to approximate, we require that topics are not far away from evenly distributed so that this approximation is reasonable. In practice we can also initialize using other methods, for example we can do alternating gradient descent on  $B_1, B_2$  and  $M$  based on the objective function (10). This method also works reasonably well in practice.

## C Detailed node-topic matrices for citation dataset

The detailed two node-topic matrices for citation dataset is given in Table 4 and Table 5.

## D Additional figures

Figure 3 and Figure 4 shows the comparison result for binary observation in Section 6, with known topics and unknown topics, respectively.

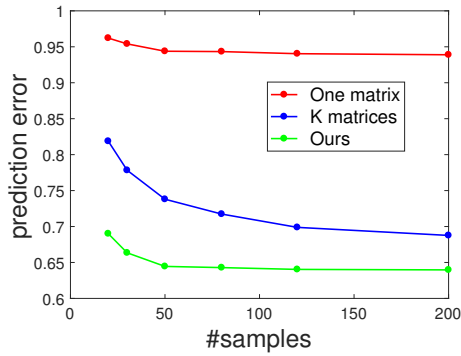

Figure 3: Prediction error for binary observation, with known topics

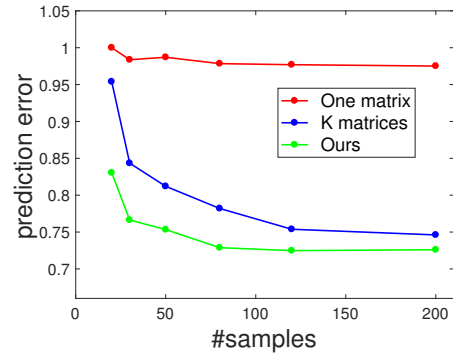

Figure 4: Prediction error for binary observation, with unknown topics

Table 4: The influence matrix  $B_1$  for citation dataset

|                   | black hole energy chains | quantum model field theory | gauge theory field effective | algebra space group structure | states space noncommutative boundary | string theory supergravity supersymmetric |
|-------------------|--------------------------|----------------------------|------------------------------|-------------------------------|--------------------------------------|-------------------------------------------|
| Christopher Pope  |                          | 0.359                      |                              | 0.468                         |                                      | 0.318                                     |
| Arkady Tseytlin   | 0.223                    | 0.565                      |                              | 0.25                          |                                      |                                           |
| Emilio Elizalde   |                          | 0.109                      |                              |                               |                                      |                                           |
| Cumrun Vafa       |                          |                            | 0.85                         | 0.623                         | 0.679                                | 0.513                                     |
| Edward Witten     |                          | 0.204                      |                              | 0.795                         | 0.678                                | 1.87                                      |
| Ashok Das         |                          | 0.155                      | 0.115                        | 1.07                          |                                      |                                           |
| Sergei Odintsov   |                          |                            |                              |                               |                                      |                                           |
| Sergio Ferrara    | 0.297                    | 0.889                      | 0.345                        | 0.457                         | 0.453                                | 0.249                                     |
| Renata Kallosh    | 0.44                     | 0.512                      |                              | 0.326                         | 0.382                                |                                           |
| Mirjam Cvetič     |                          | 0.339                      | 0.173                        | 0.338                         |                                      |                                           |
| Burt A. Ovrut     | 0.265                    | 0.191                      | 0.127                        | 0.328                         | 0.133                                |                                           |
| Ergin Sezgin      |                          | 0.35                       |                              | 0.286                         |                                      |                                           |
| Ian I. Kogan      |                          |                            | 0.193                        |                               |                                      |                                           |
| Gregory Moore     |                          | 0.323                      | 0.91                         | 0.325                         | 0.536                                |                                           |
| I. Antoniadis     | 0.443                    | 0.485                      |                              | 0.545                         | 0.898                                | 0.342                                     |
| Mirjam Cvetič     | 0.152                    | 0.691                      |                              | 0.228                         | 0.187                                |                                           |
| Andrew Strominger | 0.207                    | 0.374                      | 0.467                        | 1.15                          |                                      |                                           |
| Barton Zwiebach   | 0.16                     |                            |                              | 0.222                         | 0.383                                | 0.236                                     |
| P.K. Townsend     |                          | 0.629                      |                              | 0.349                         |                                      | 0.1                                       |
| Robert C. Myers   |                          | 0.439                      |                              | 0.28                          |                                      |                                           |
| E. Bergshoeff     |                          | 0.357                      |                              | 0.371                         |                                      |                                           |
| Amihay Hanany     |                          | 0.193                      |                              | 0.327                         |                                      | 1.09                                      |
| Ashoke Sen        | 0.319                    |                            |                              | 0.523                         |                                      | 0.571                                     |

Table 5: The receptivity matrix  $B_2$  for citation dataset

|                   | black<br>hole<br>energy<br>chains | quantum<br>model<br>field<br>theory | gauge<br>theory<br>field<br>effective | algebra<br>space<br>group<br>structure | states<br>space<br>noncommutative<br>boundary | string<br>theory<br>supergravity<br>supersymmetric |
|-------------------|-----------------------------------|-------------------------------------|---------------------------------------|----------------------------------------|-----------------------------------------------|----------------------------------------------------|
| Christopher Pope  | 0.477                             | 0.794                               |                                       | 0.59                                   |                                               |                                                    |
| Arkady Tseytlin   | 0.704                             | 1.16                                | 0.312                                 | 0.487                                  |                                               | 0.119                                              |
| Emilio Elizalde   |                                   |                                     |                                       |                                        |                                               |                                                    |
| Cumrun Vafa       | 0.309                             |                                     | 0.428                                 | 0.844                                  | 0.203                                         | 0.693                                              |
| Edward Witten     | 0.352                             |                                     | 0.554                                 | 0.585                                  | 0.213                                         | 0.567                                              |
| Ashok Das         | 0.494                             | 0.339                               |                                       | 0.172                                  |                                               |                                                    |
| Sergei Odintsov   |                                   | 0.472                               |                                       |                                        |                                               |                                                    |
| Sergio Ferrara    | 0.423                             | 0.59                                | 0.664                                 | 0.776                                  |                                               |                                                    |
| Renata Kallosh    | 0.123                             | 0.625                               | 0.638                                 | 0.484                                  |                                               | 0.347                                              |
| Mirjam Cvetič     | 0.47                              | 0.731                               |                                       | 0.309                                  |                                               |                                                    |
| Burt A. Ovrut     | 0.314                             | 0.217                               | 0.72                                  | 0.409                                  |                                               | 0.137                                              |
| Ergin Sezgin      |                                   | 0.108                               | 0.161                                 | 0.358                                  |                                               |                                                    |
| Ian I. Kogan      | 0.357                             | 0.382                               |                                       |                                        |                                               | 0.546                                              |
| Gregory Moore     | 0.375                             | 0.178                               | 0.721                                 | 0.69                                   | 0.455                                         | 0.517                                              |
| I. Antoniadis     | 0.461                             |                                     | 0.699                                 | 0.532                                  |                                               | 0.189                                              |
| Mirjam Cvetič     | 0.409                             | 1.11                                | 0.173                                 | 0.361                                  |                                               |                                                    |
| Andrew Strominger |                                   | 0.718                               | 0.248                                 | 0.196                                  | 0.133                                         |                                                    |
| Barton Zwiebach   |                                   |                                     | 0.308                                 | 0.204                                  |                                               | 0.356                                              |
| P.K. Townsend     | 0.337                             | 0.225                               | 0.245                                 | 0.522                                  |                                               |                                                    |
| Robert C. Myers   | 0.364                             | 0.956                               |                                       | 0.545                                  |                                               | 0.139                                              |
| E. Bergshoeff     | 0.487                             | 0.459                               | 0.174                                 | 0.619                                  |                                               |                                                    |
| Amihay Hanany     | 0.282                             |                                     | 0.237                                 | 0.575                                  |                                               | 0.732                                              |
| Ashoke Sen        |                                   | 0.214                               | 0.18                                  | 0.37                                   |                                               |                                                    |
